# Supplementary material
Source: Research Square preprint supplement (doi:10.21203/rs.3.rs-8909935/v1)
Supplement: Supplementary file 1 [file 152d1a2b1768f266b86c4741.pdf]

## Supplementary Fig. 6

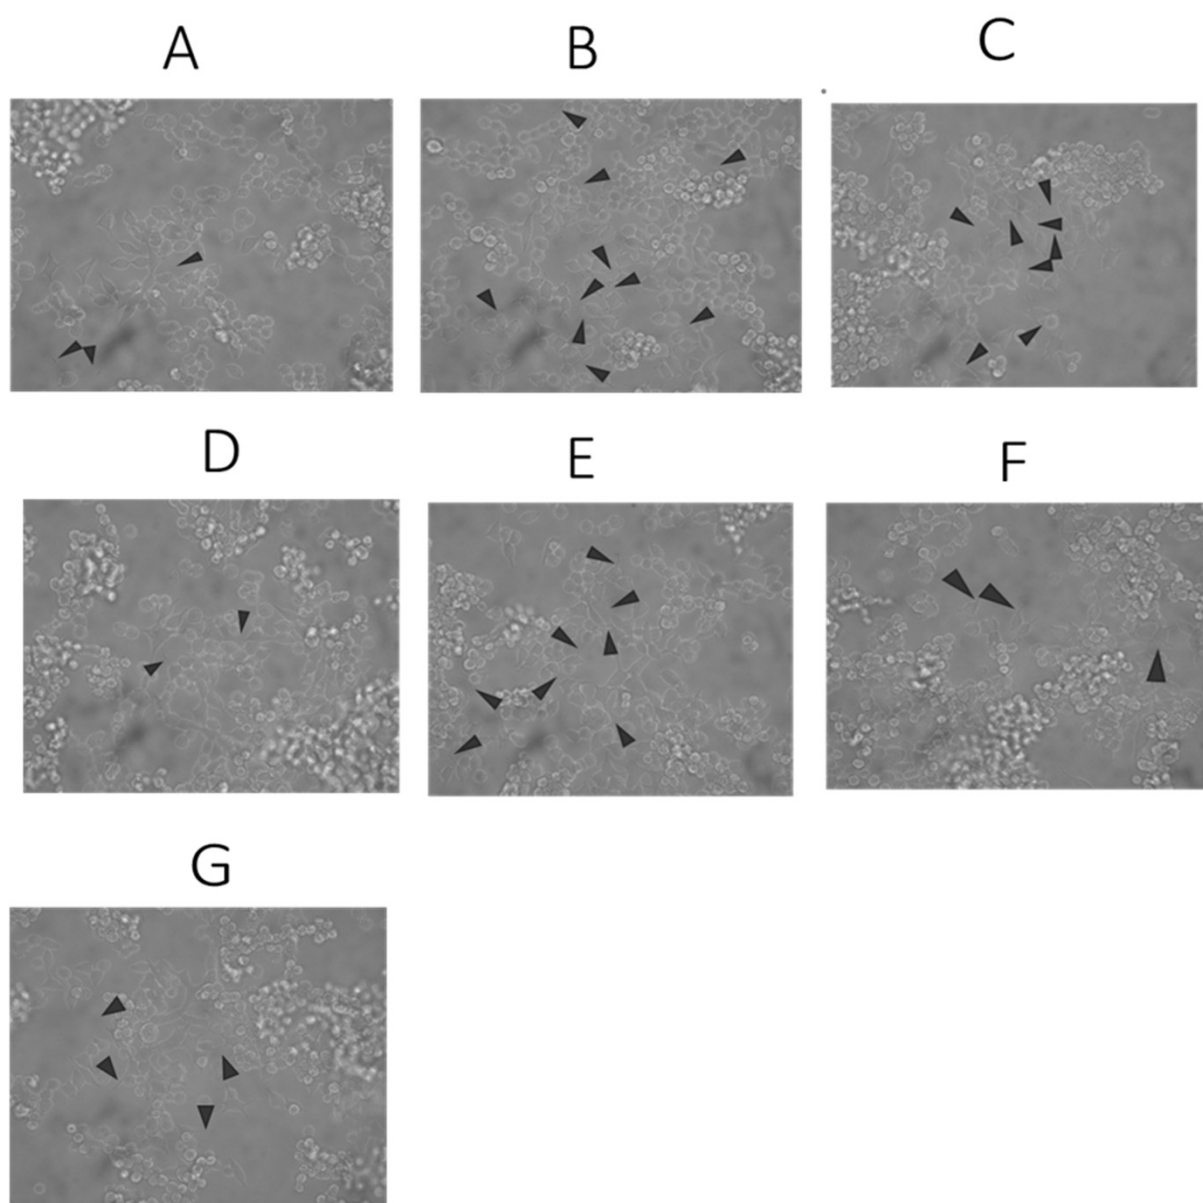

A ; Control

B ; Propolis (20 µg/ml)

C ; Propolis (20 µg/ml)  
+ U0126 (5 µM)

D ; Propolis (20 µg/ml)  
+ HC-030031 (30 µM)

E ; Curcumin (2 µg/ml)

F ; Curcumin (2 µg/ml)  
+ U0126 (5 µM)

G ; Curcumin (2 µg/ml)  
+ HC-030031 (30 µM)
