# Supplementary material
Source: Research Square preprint supplement (doi:10.21203/rs.3.rs-8909935/v1)
Supplement: Supplementary file 2 [file 1ace84debe59e8e8ecaa21fa.pdf]

## Supplementary Fig. 8

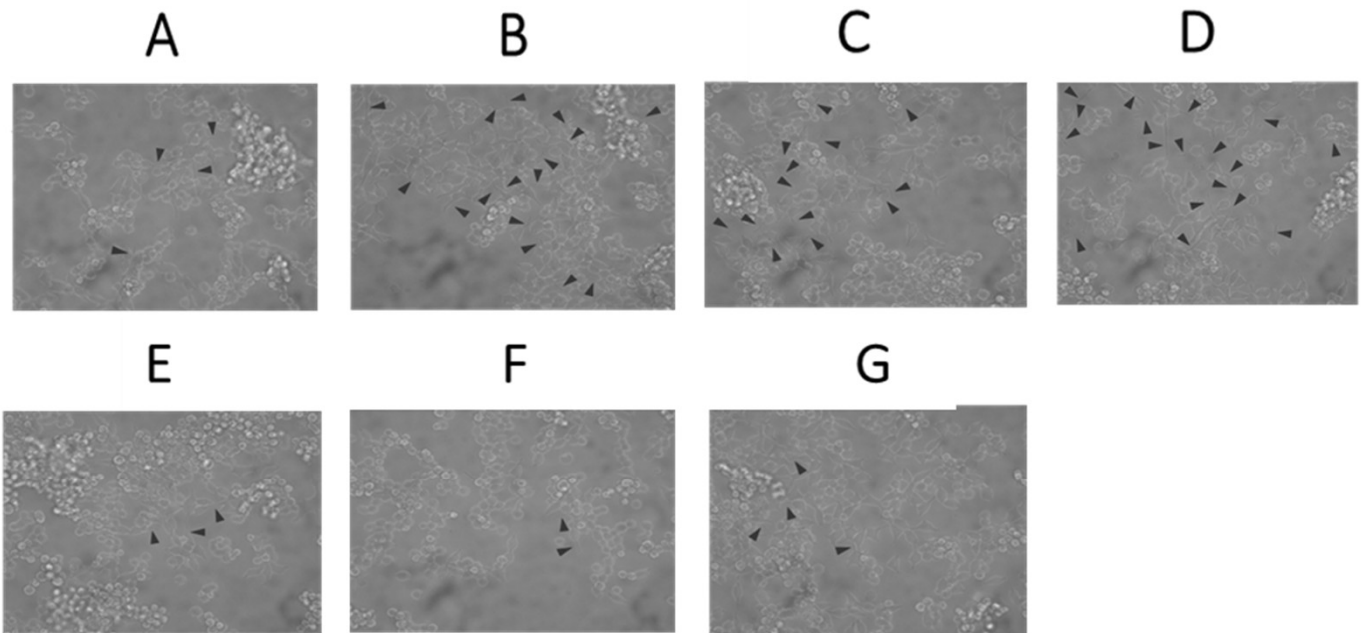

**A ; Control**

**B ; Propolis 6.7  $\mu\text{g}/\text{ml}$  + Curcumin 0.67  $\mu\text{g}/\text{ml}$**

**C ; Propolis 13.4  $\mu\text{g}/\text{ml}$  + Curcumin 1.34  $\mu\text{g}/\text{ml}$**

**D ; Propolis 2.0  $\mu\text{g}/\text{ml}$  + Curcumin 2.0  $\mu\text{g}/\text{ml}$**

**E ; Propolis 6.7  $\mu\text{g}/\text{ml}$  + Curcumin 0.67  $\mu\text{g}/\text{ml}$  + U0126 5 $\mu\text{M}$**

**F ; Propolis 13.4  $\mu\text{g}/\text{ml}$  + Curcumin 1.34  $\mu\text{g}/\text{ml}$  + U0126 5 $\mu\text{M}$**

**G ; Propolis 20  $\mu\text{g}/\text{ml}$  + Curcumin 2.0  $\mu\text{g}/\text{ml}$  + U0126 5 $\mu\text{M}$**
