# Supplementary material
Source: Research Square preprint supplement (doi:10.21203/rs.3.rs-8909935/v1)
Supplement: Supplementary file 4 [file 37b0c6beef665497b11ad31f.pdf]

## Supplementary Fig. 9

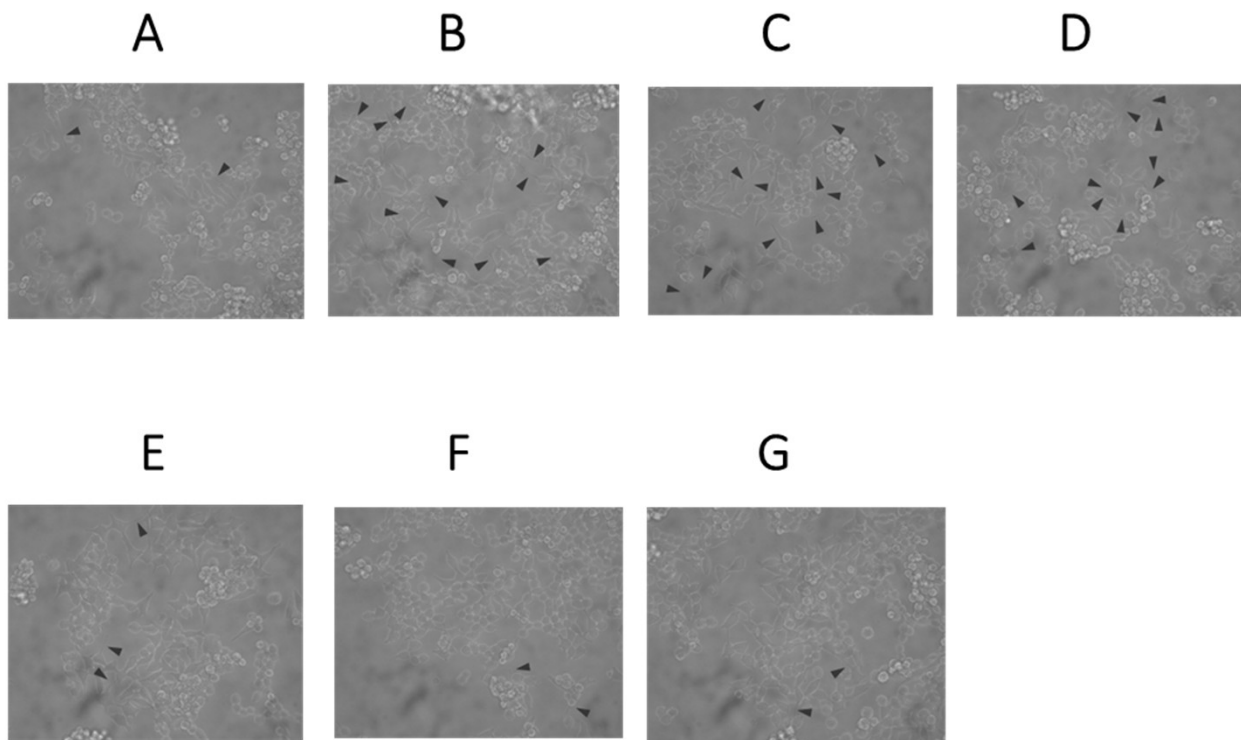

A ; Control

B ; Propolis 6.7  $\mu\text{g/ml}$  + Curcumin 0.67  $\mu\text{g/ml}$

C ; Propolis 13.4  $\mu\text{g/ml}$  + Curcumin 1.34  $\mu\text{g/ml}$

D ; Propolis 20  $\mu\text{g/ml}$  + Curcumin 2.0  $\mu\text{g/ml}$

E ; Propolis 6.7  $\mu\text{g/ml}$  + Curcumin 0.67  $\mu\text{g/ml}$  + SB203580 1 $\mu\text{M}$

F ; Propolis 13.4  $\mu\text{g/ml}$  + Curcumin 1.34  $\mu\text{g/ml}$  + SB203580 1 $\mu\text{M}$

G ; Propolis 20  $\mu\text{g/ml}$  + Curcumin 2.0  $\mu\text{g/ml}$  + SB203580 1 $\mu\text{M}$
