# Supplementary material
Source: Research Square preprint supplement (doi:10.21203/rs.3.rs-8909935/v1)
Supplement: Supplementary file 5 [file 40b3f5dc5dd2cba98995bcfb.pdf]

# Supplementary Fig. 13

Phospho p38 MAPK

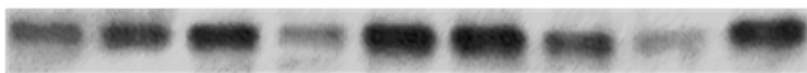

Phospho ERK

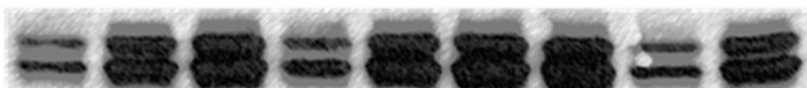

p38 MAPK

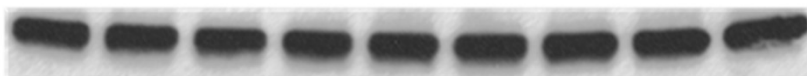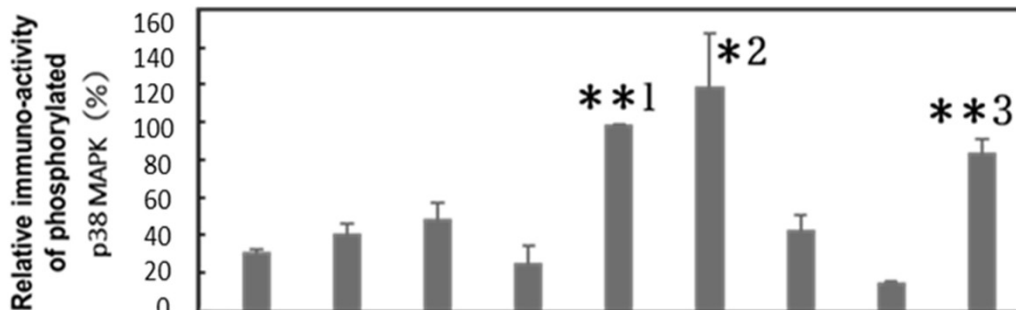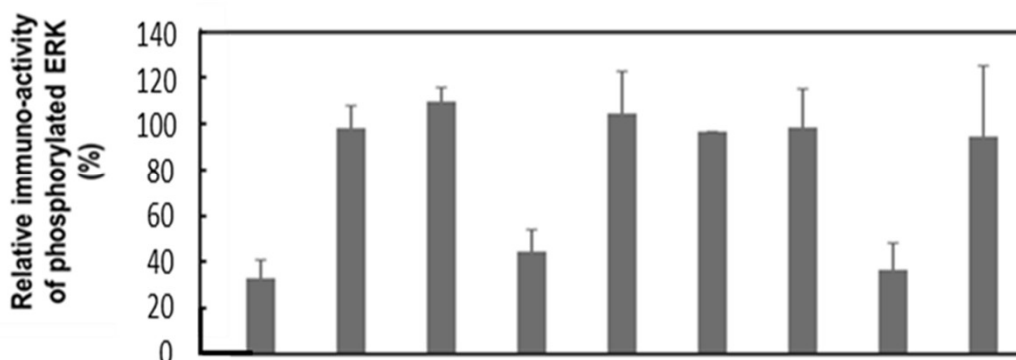

Curcumin ( $\mu\text{g}/\text{ml}$ )

— 2 4 — 2 4 4 — 2

Artepillin C ( $\mu\text{g}/\text{ml}$ )

— — — 2 2 4 1 — —

Propolis Frc. ( $\mu\text{g}/\text{ml}$ )

— — — — — — — 6.7 6.7
