# Supplementary material
Source: Research Square preprint supplement (doi:10.21203/rs.3.rs-8909935/v1)
Supplement: Supplementary file 7 [file 4d349d5bf50f618e66581b84.pdf]

## Supplementary Fig. 7

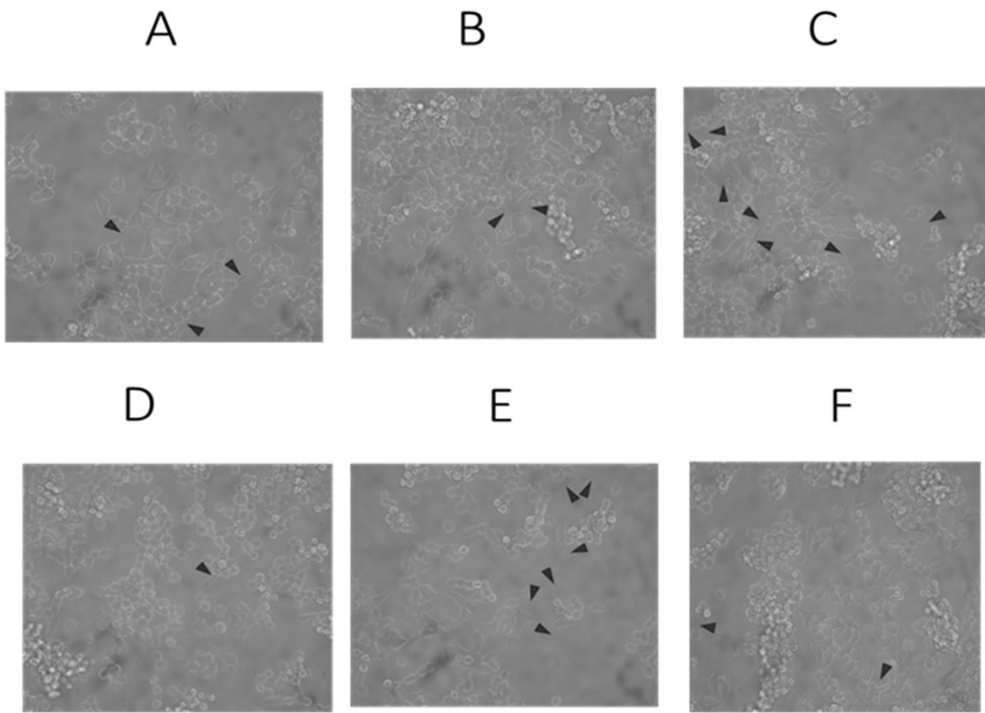

A ; Control

B ; SB203580(SB) (1µM)

C ; Propolis (20 µg/ml)

D ; Propolis (20 µg/ml) + SB (1µM)

E ; Curcumin (2 µg/ml)

F ; Curcumin (2 µg/ml) + SB (1µM)
