# Supplementary material
Source: Research Square preprint supplement (doi:10.21203/rs.3.rs-8909935/v1)
Supplement: Supplementary file 12 [file c0aa568651e3e9e7bcef5329.pdf]

## Supplementary Fig. 2

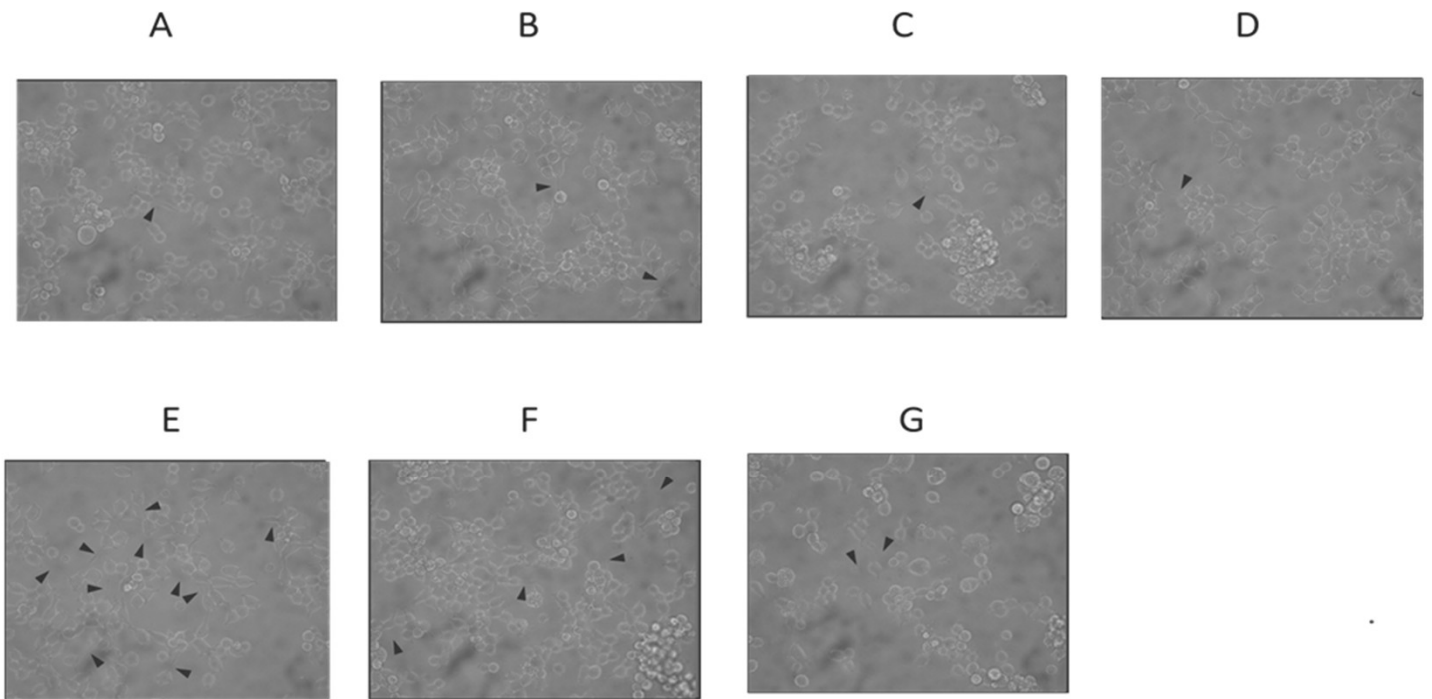

**A ; Control**

**B ; Propolis 20 µg/ml**

**C ; Ginkgo biloba 20 µg/ml**

**D ; Curcumin 2 µg/ml**

**E ; Propolis 20 µg/ml + Ginkgo biloba 20 µg/ml**

**F ; Propolis 20 µg/ml + Curcumin 2 µg/ml**

**G ; Ginkgo biloba 20 µg/ml + Curcumin 2 µg/ml**
