# Supplementary material
Source: Research Square preprint supplement (doi:10.21203/rs.3.rs-8909935/v1)
Supplement: Supplementary file 15 [file d33c29af95f7585e21b433ca.pdf]

# Supplementary Fig. 4

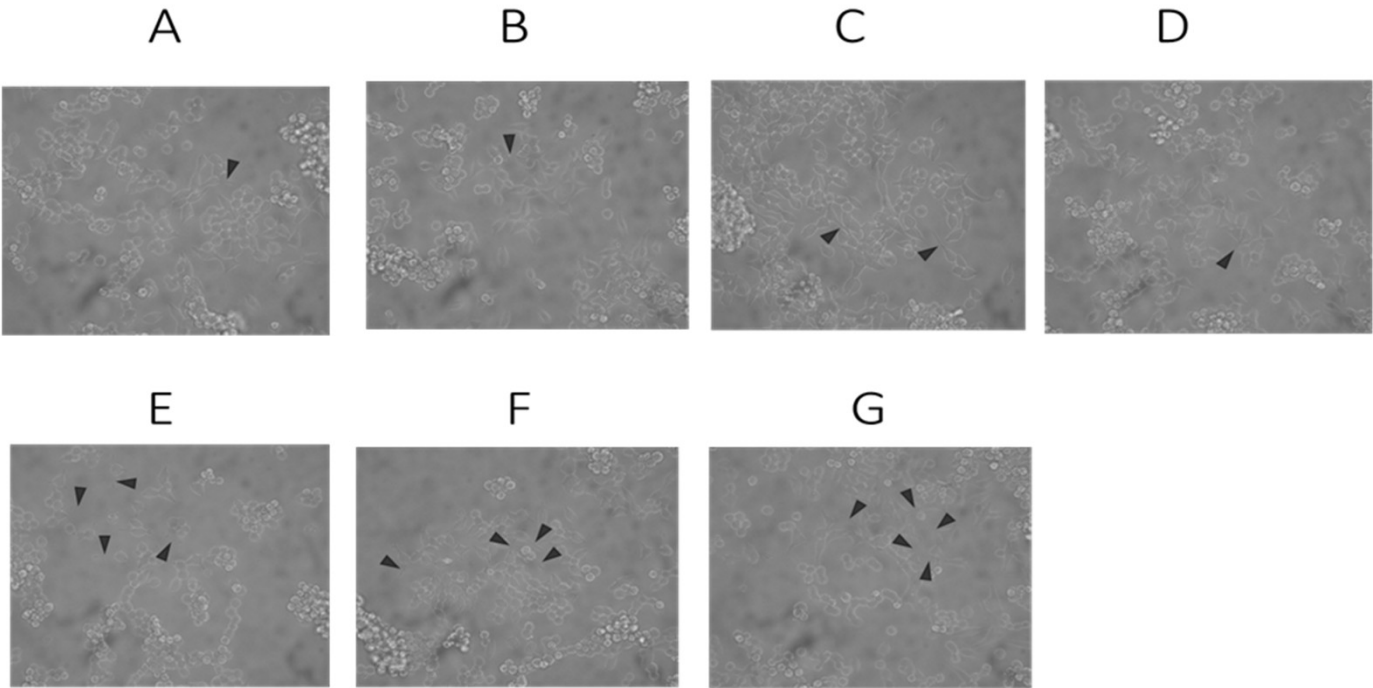

A ; Control  
B ; Propolis (6.7 μg/ml)  
C ; Curcumin (0.67 μg/ml)  
D ; Gingyo biloba (6.7 μg/ml)

E ; Propolis (6.7 μg/ml) + Curcumin (0.67 μg/ml)  
F ; Propolis (6.7 μg/ml) + Gingyo biloba (6.7 μg/ml)  
G ; Curcumin (0.67 μg/ml) + Gingyo biloba (6.7 μg/ml)
