# Supplementary material
Source: Research Square preprint supplement (doi:10.21203/rs.3.rs-8909935/v1)

# Supplementary Fig. 10

**A**

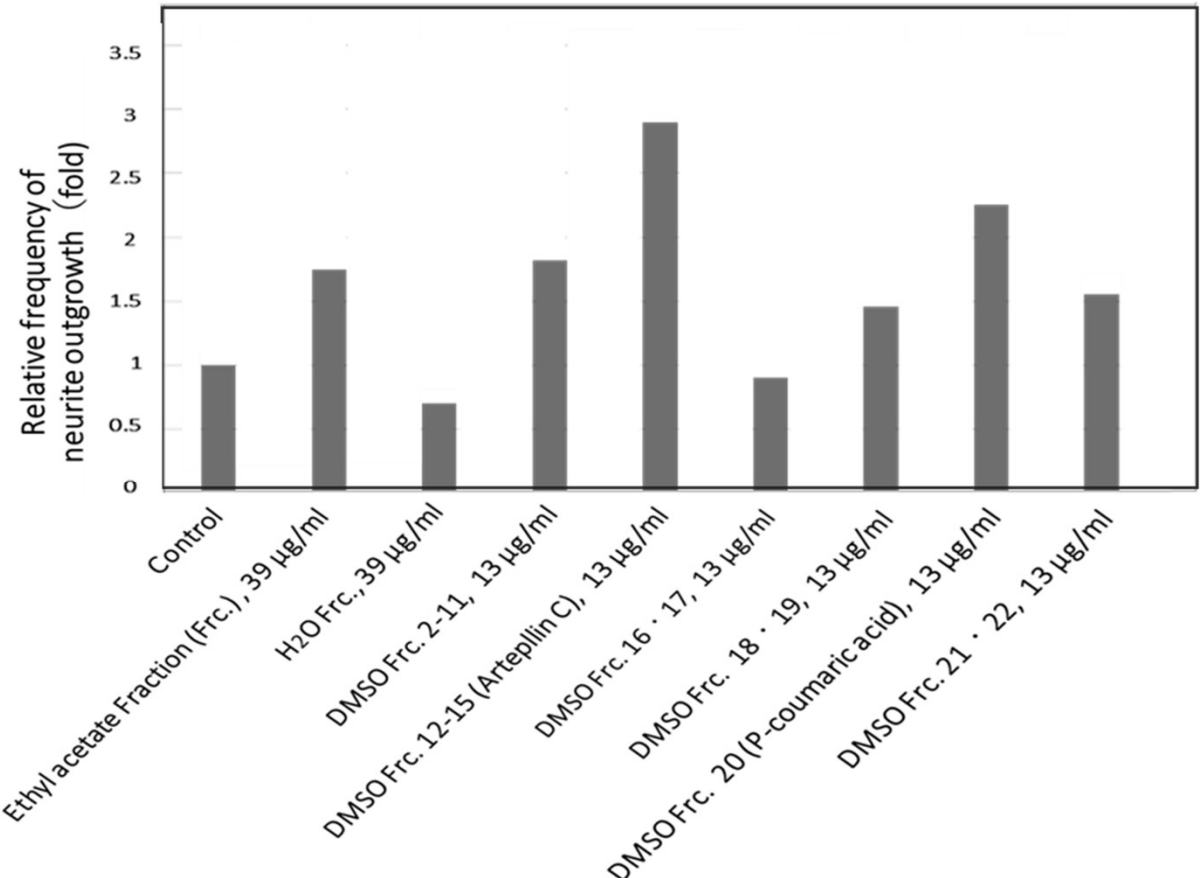

**B**

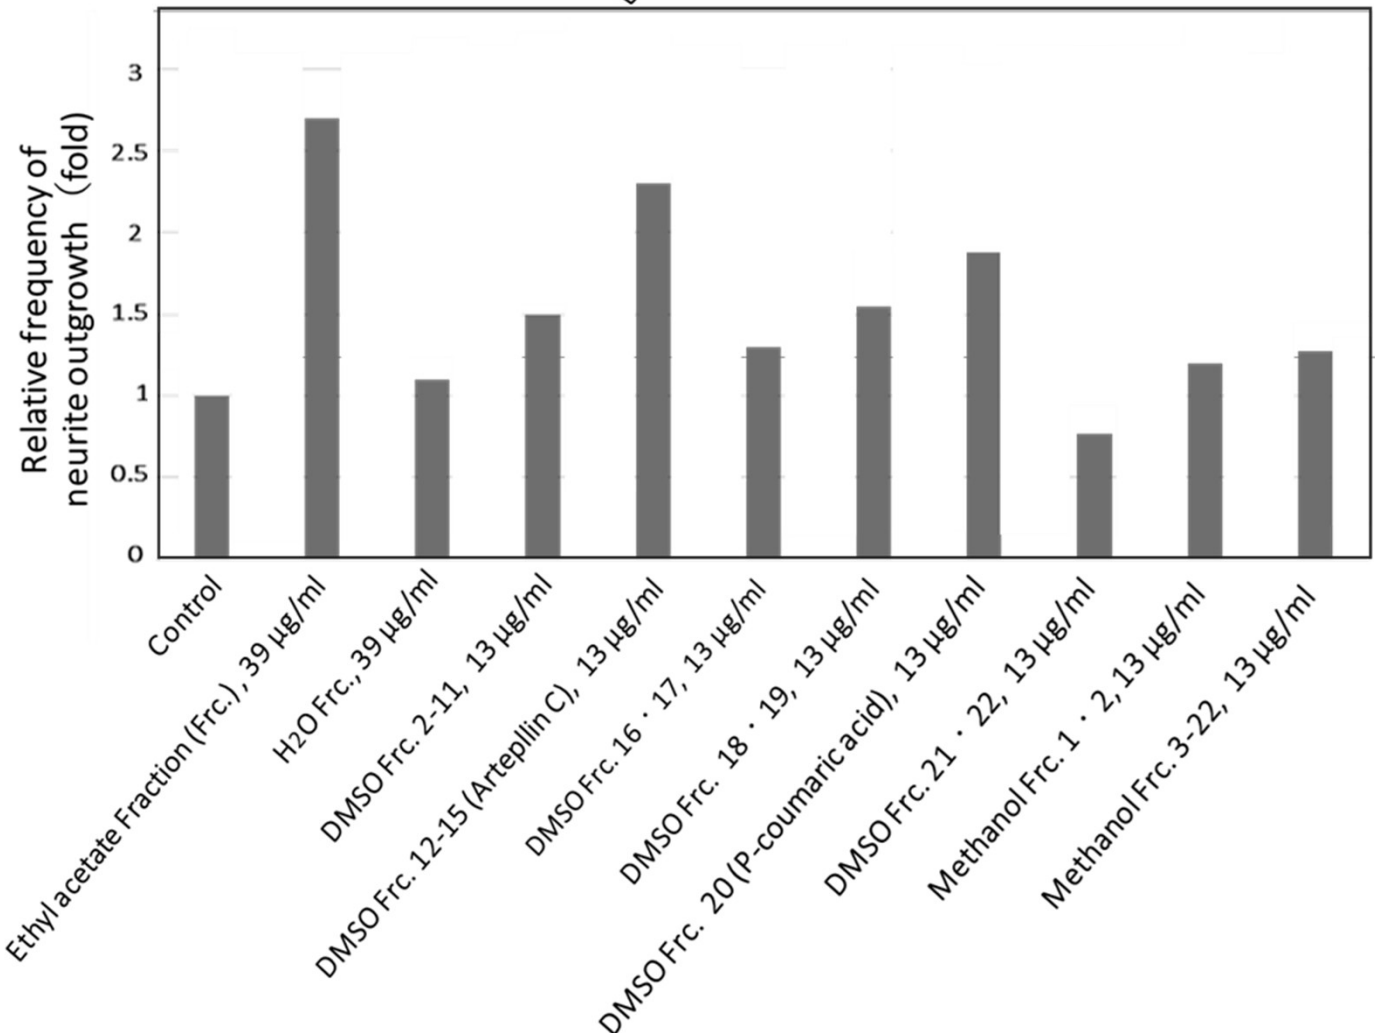

Supplement: Supplementary file 3 [file 2f426884f957e63796f7ecf9.pdf]

# Supplementary Fig. 5

A

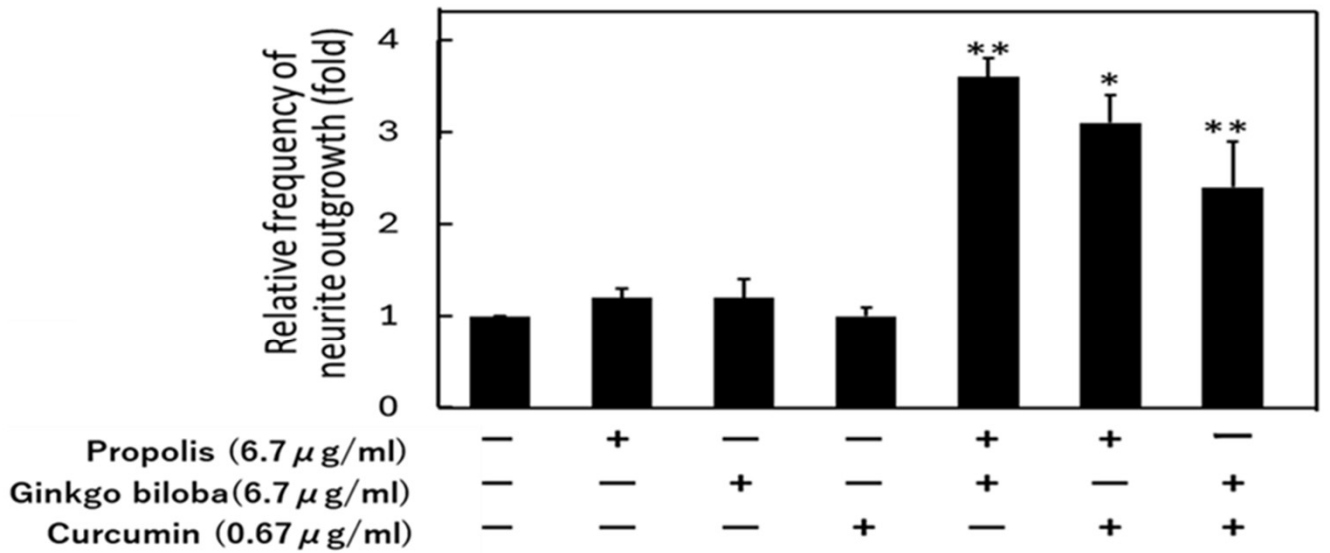

B

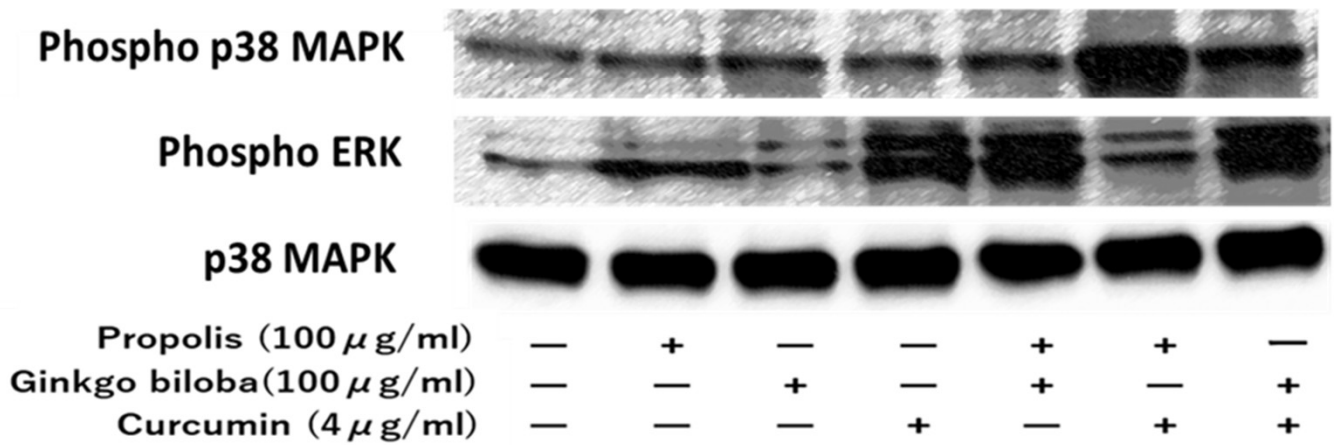

Supplement: Supplementary file 6 [file 4a95d5ebdebf4932fb538d2b.pdf]

# Supplementary Fig. 1

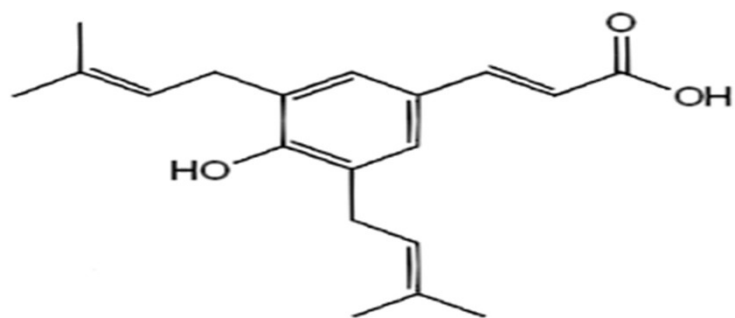

( 1 )

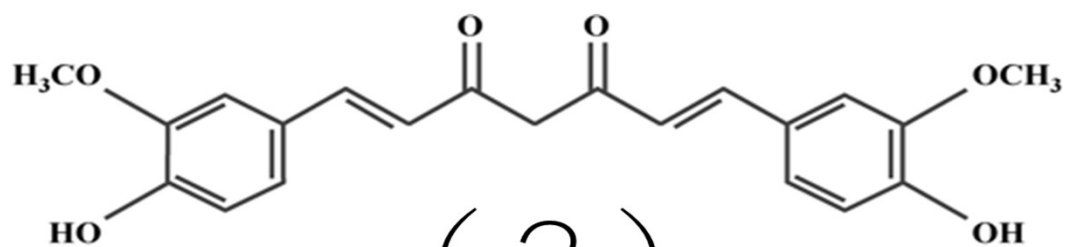

( 2 )

Supplement: Supplementary file 8 [file 65a9b95ef298b915e39e4e34.pdf]

# Supplementary Fig. 3

A

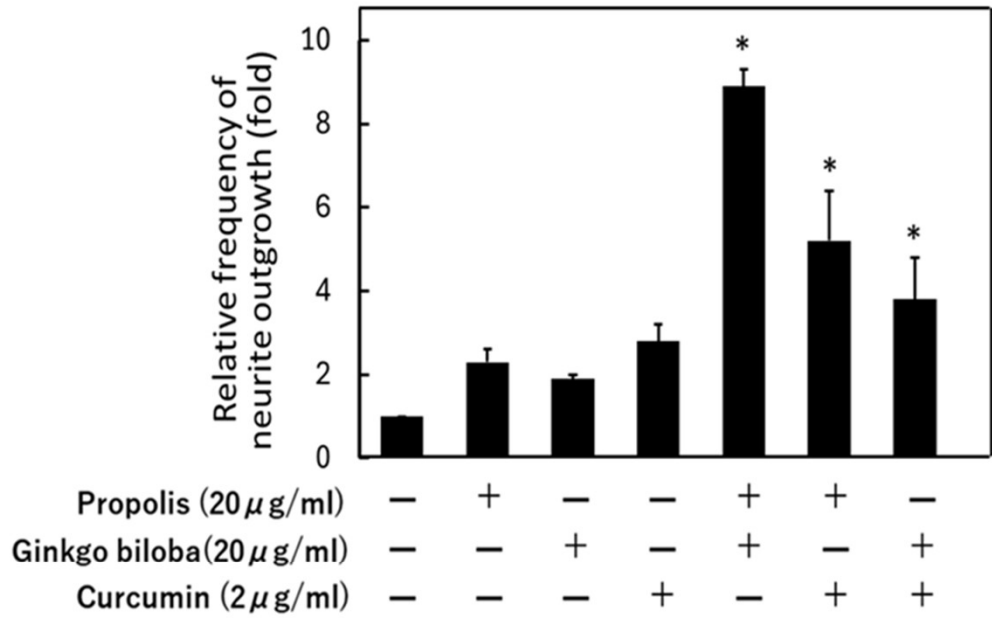

B

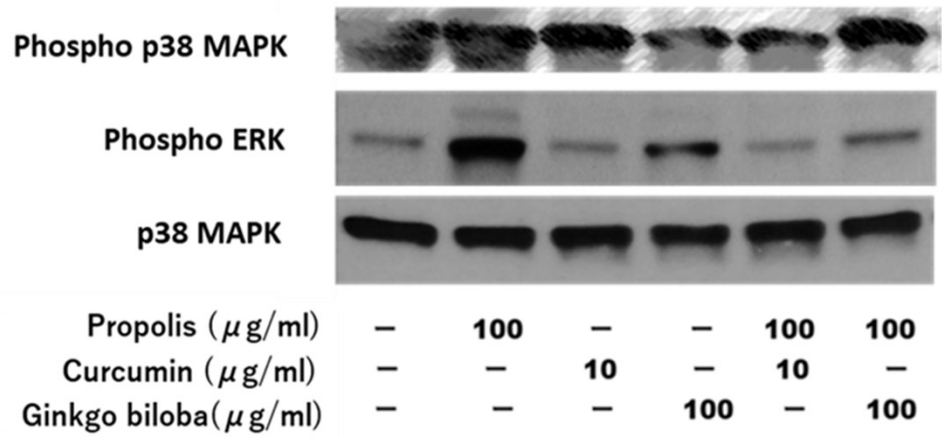

Supplement: Supplementary file 9 [file 69f7b628b1d95dd1eff0452c.pdf]

# Supplementary Fig. 11

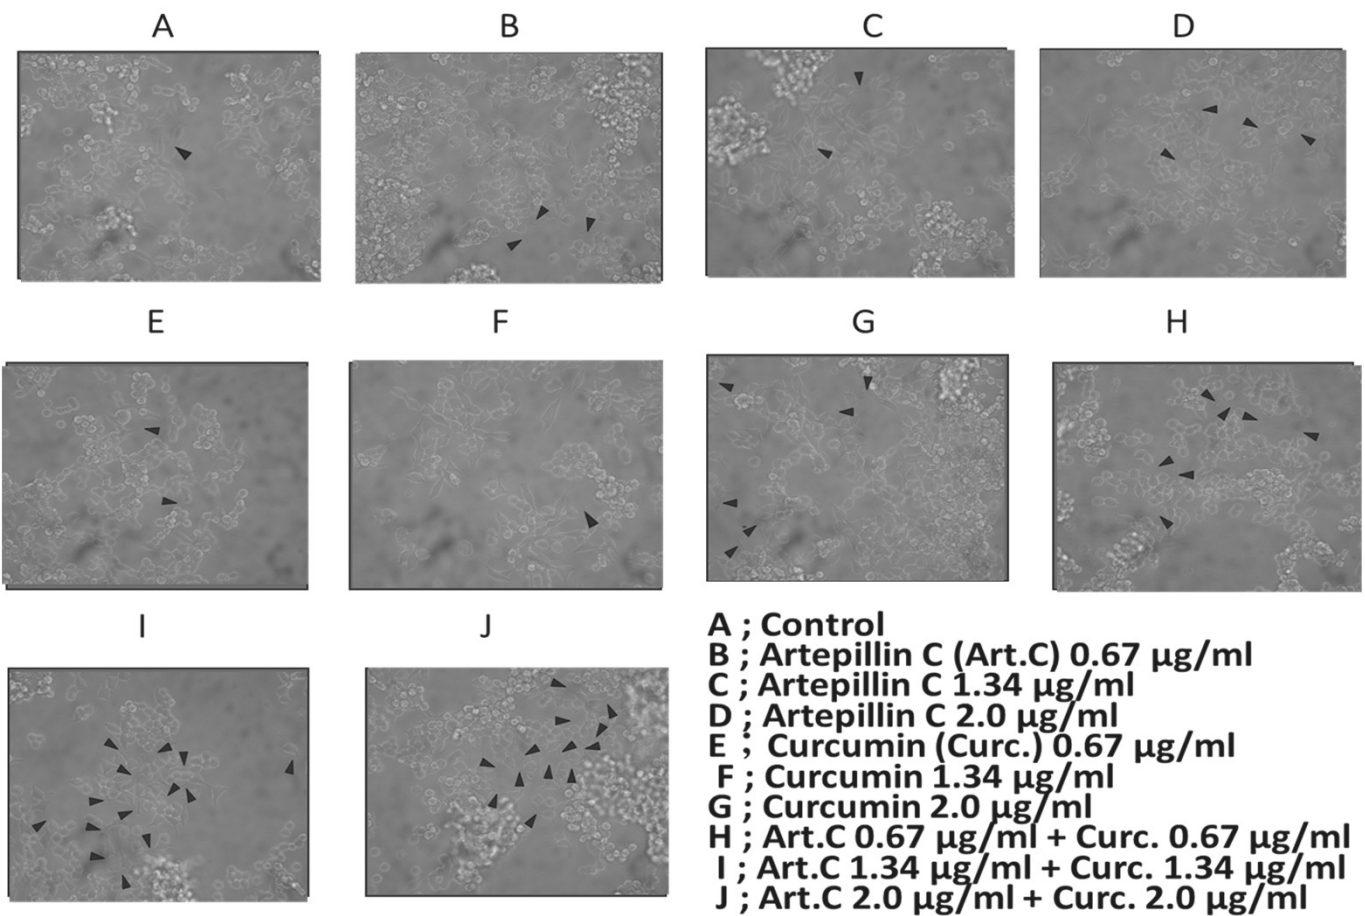

Supplement: Supplementary file 10 [file 7ee0985126ffb810604d7374.pdf]

## Supplementary Fig. 15

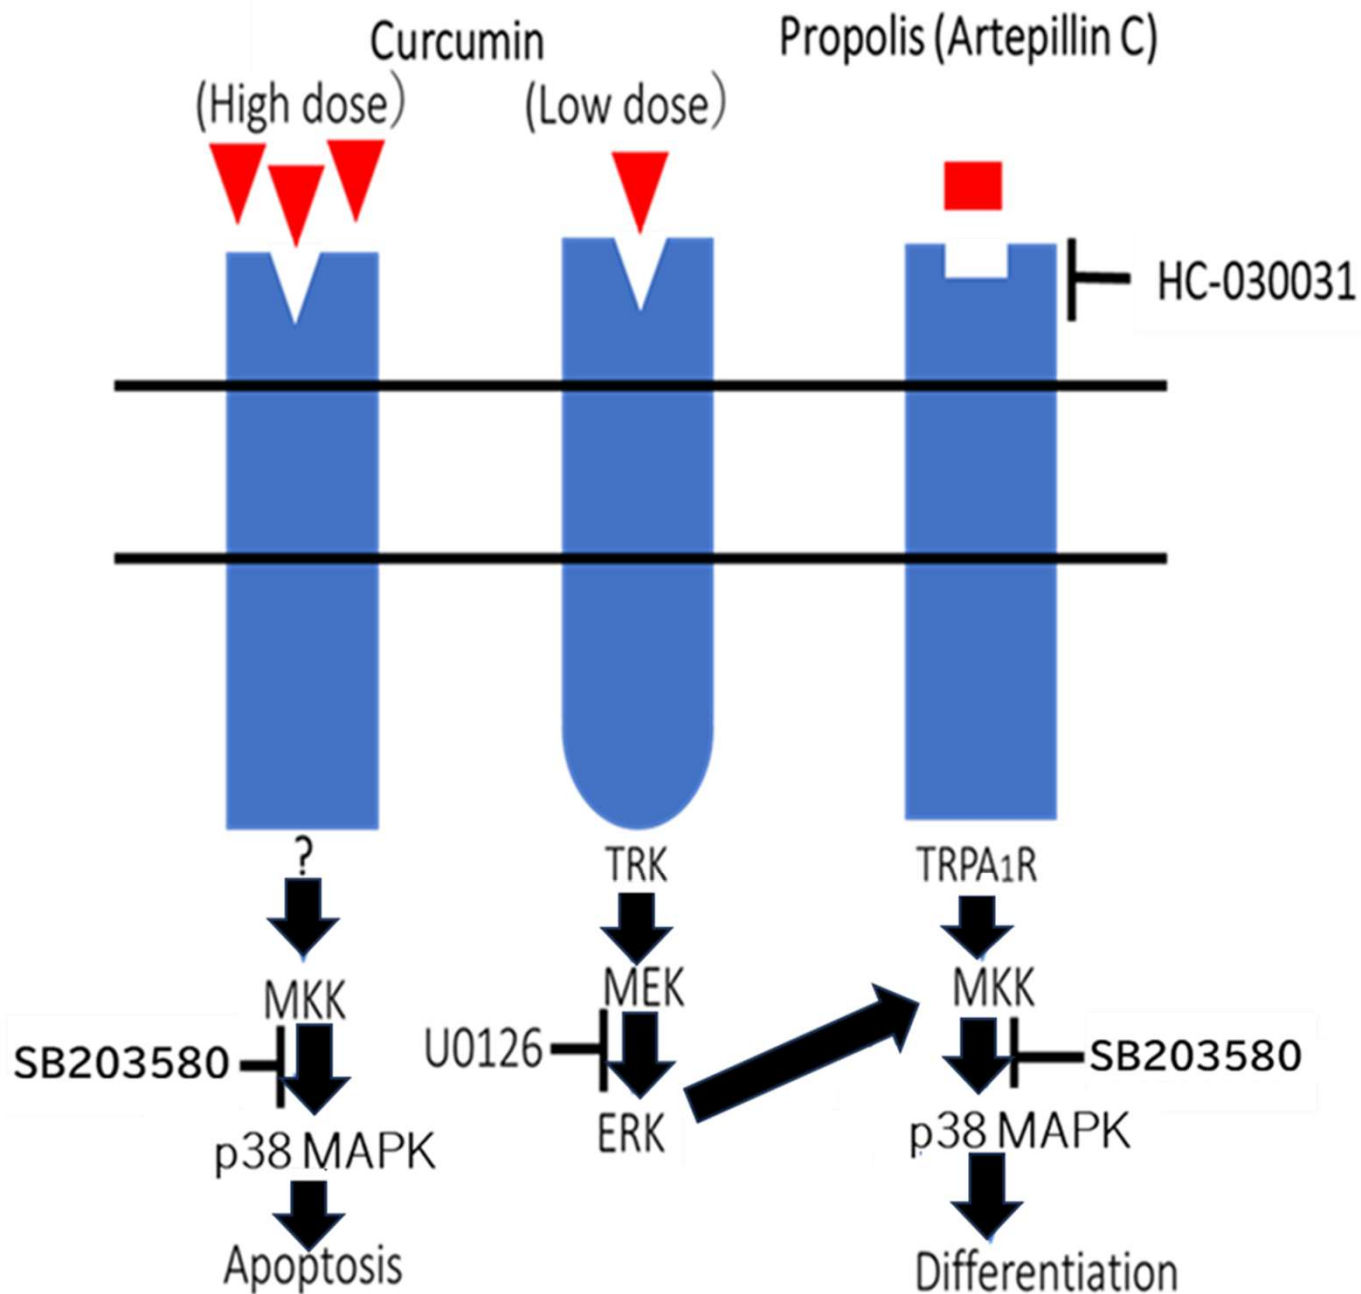

Supplement: Supplementary file 11 [file 8af2c349ef942a21d70d26d9.pdf]

# Supplementary Fig. 12

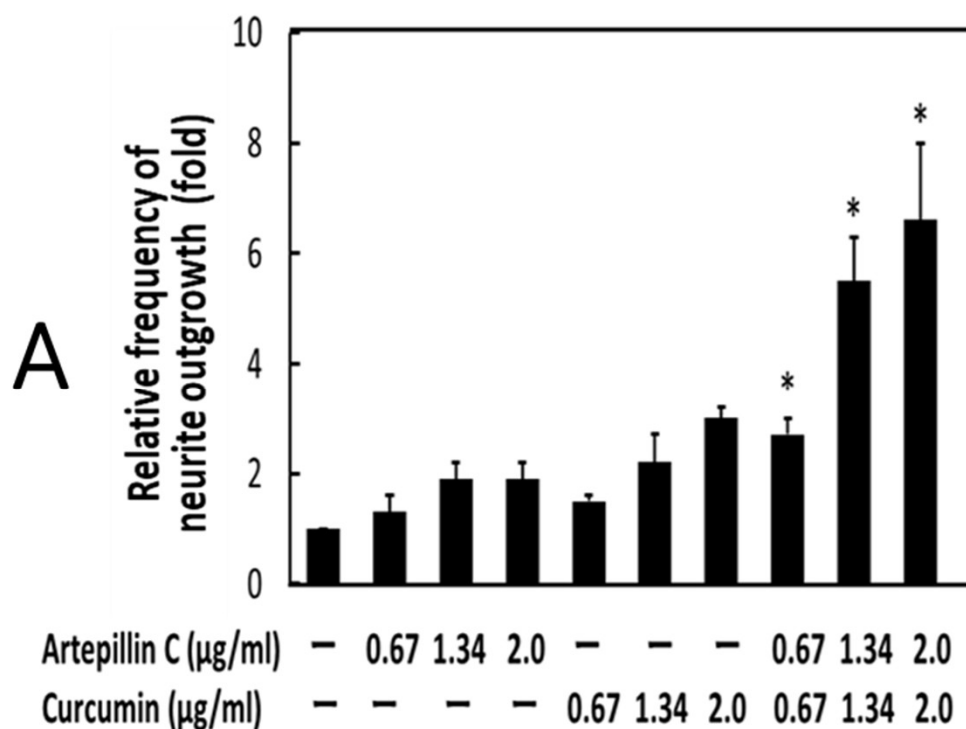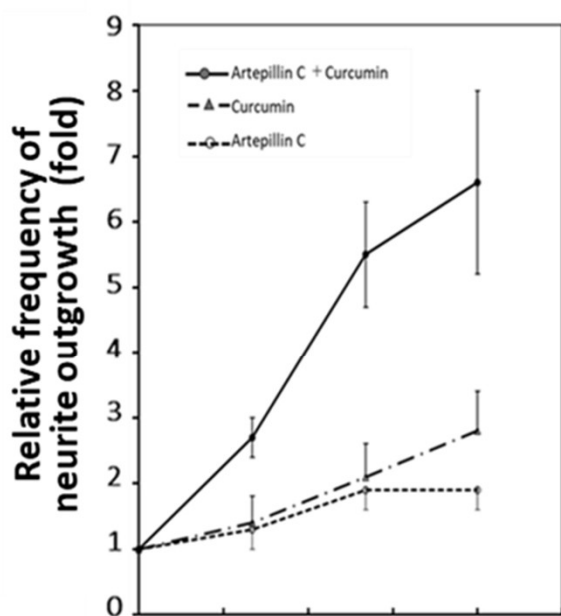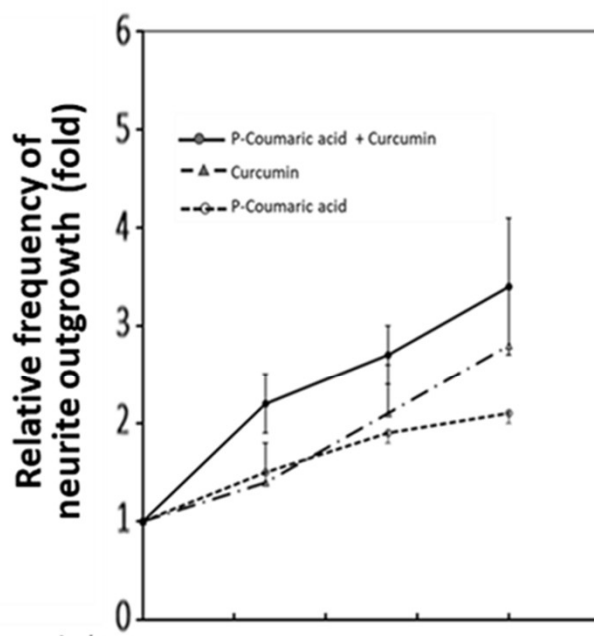

Artepillin C (µg/ml) 0 0.5 1 1.5 2

Curcumin (µg/ml) 0 0.5 1 1.5 2

Curcumin (µg/ml) 0 0.5 1 1.5 2

P-Coumaric acid (µg/ml) 0 0.5 1 1.5 2

Supplement: Supplementary file 13 [file cd9e72e36cc399aec90494fd.pdf]

# Supplementary Fig. 14

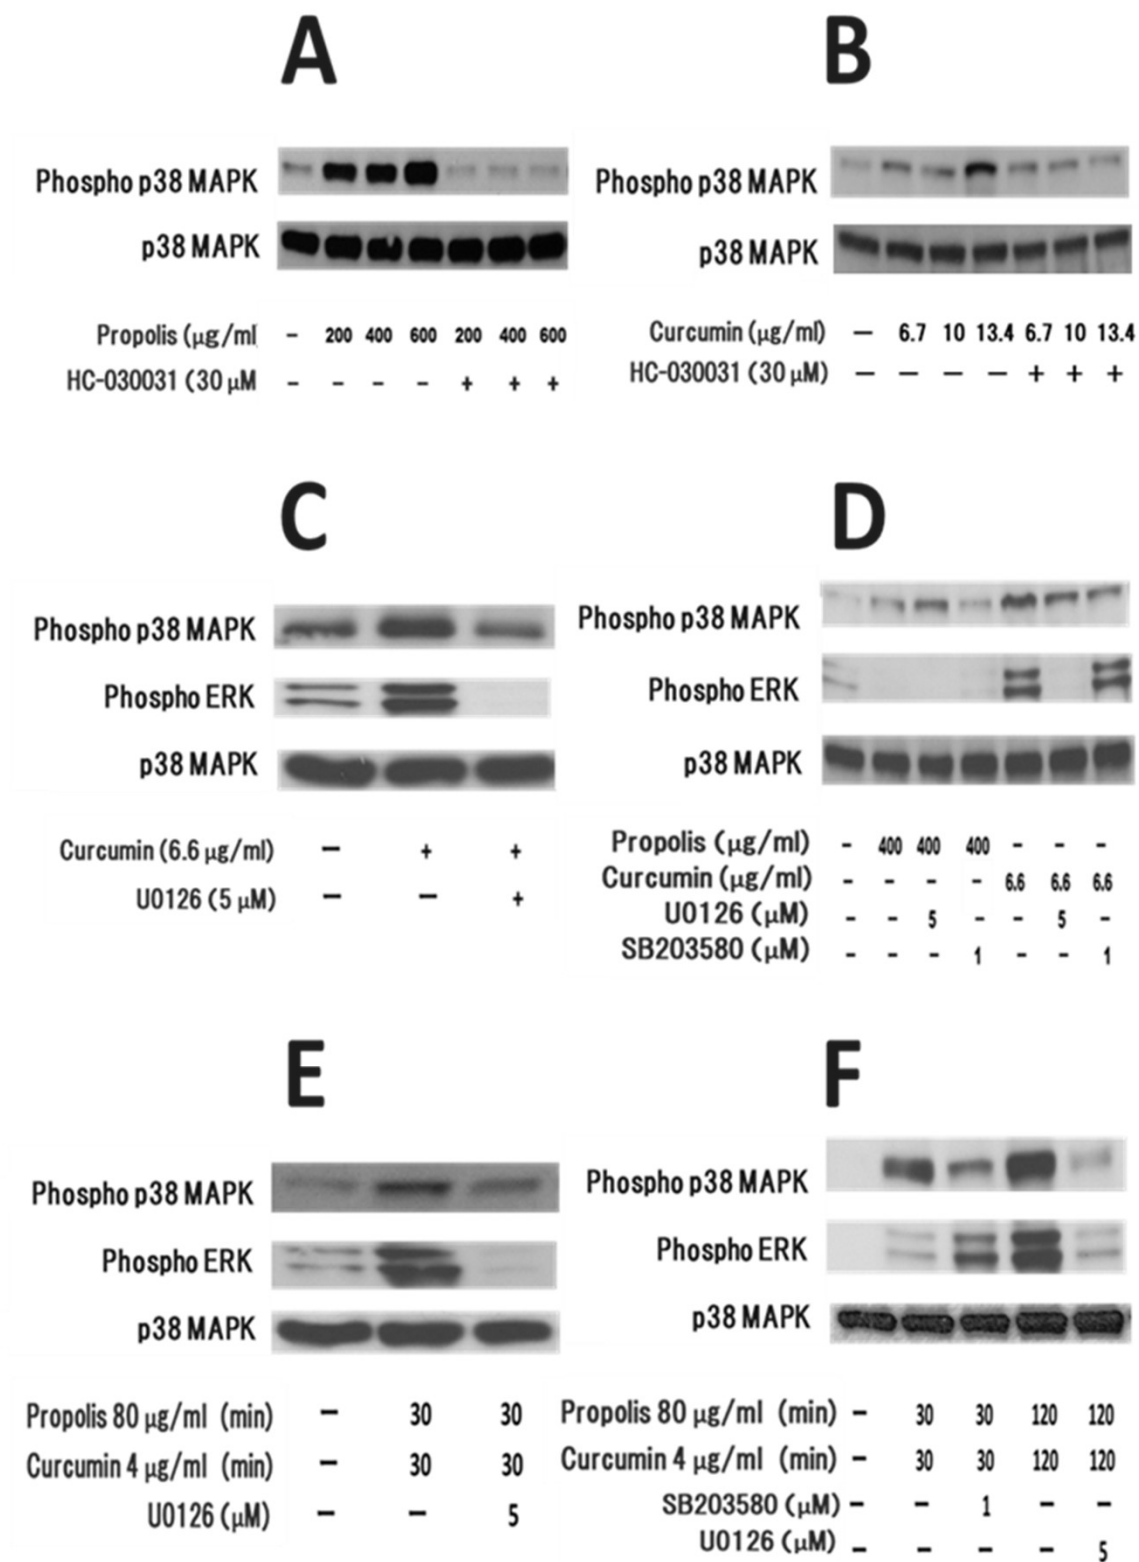

Supplement: Supplementary file 14 [file cef01e9302b6a4facd0bc9cc.pdf]
